# Supplementary material
Source: PubMed Central journal article supplement (PMC1815257)
Supplement: pnas_0611226104_1.pdf [file pnas_0611226104_1.pdf]

**Table 5. Genotypes of wild barley sampled from Maalot site**

|           | 64 | 120 | 151 | 194 | 249 | 269 | 277 | 286 | 336 | 339 | 351 | 462 | 546 | 549 | 603 | 625 |
|-----------|----|-----|-----|-----|-----|-----|-----|-----|-----|-----|-----|-----|-----|-----|-----|-----|
| Consensus | C  | C   | G   | A   | G   | T   | T   | A   | G   | C   | T   | C   | T   | C   | G   | A   |
| 10.1      |    |     |     |     |     |     |     |     |     |     |     |     | C   |     | ?   | ?   |
| 10.3      |    |     |     |     |     |     |     |     |     |     |     |     | C   |     | ?   | ?   |
| 10.4      |    |     |     |     |     |     |     |     |     |     |     |     | C   |     |     |     |
| 10.5      |    |     |     |     |     |     |     |     |     |     |     |     | C   |     | ?   | ?   |
| 10.6      |    |     |     |     |     |     |     |     |     |     |     |     | C   |     | ?   | ?   |
| 10.8      |    |     |     |     |     |     |     |     |     |     |     |     | C   |     |     |     |
| 10.9      |    |     |     |     |     |     |     |     |     |     |     |     | C   |     |     |     |
| 10.11     |    |     |     |     |     |     |     |     |     |     |     |     | C   |     |     |     |
| 10.14     |    |     |     |     |     |     |     |     |     |     |     |     | C   |     |     |     |
| 10.15     |    |     |     |     |     |     |     |     |     |     |     |     | C   |     |     |     |
| 10.19     |    |     |     |     |     |     |     |     |     |     |     |     | C   |     |     |     |
| 10.21     |    |     |     |     |     |     |     |     |     |     |     |     | C   |     |     |     |
| 10.23     |    |     |     |     |     |     |     |     |     |     |     |     | C   |     |     |     |
| 10.24     |    |     |     |     |     |     |     |     |     |     |     |     | C   |     |     |     |
| 10.27     |    |     |     |     |     |     |     |     |     |     |     |     | C   |     | ?   | ?   |
| 10.28     |    |     |     |     |     |     |     |     |     |     |     |     | C   |     |     |     |
| 10.30     |    |     |     |     |     |     |     |     |     |     |     |     | C   |     | ?   | ?   |
| 10.32     |    |     |     |     |     |     |     |     |     |     | C   |     | C   |     |     |     |
| 10.34     |    |     |     |     |     |     |     |     |     |     |     |     | C   |     |     |     |
| 10.35     |    |     |     |     |     |     |     |     |     |     |     |     | C   |     |     |     |
| 10.36     |    |     |     |     |     |     |     |     |     |     |     |     | C   |     |     | ?   |
| 10.37     |    |     |     |     |     |     |     |     |     |     |     |     | C   |     |     |     |
| 10.38     |    |     |     |     |     |     |     |     |     |     |     |     | C   |     |     |     |
| 10.40     |    |     |     |     |     |     |     |     |     |     |     |     | C   |     |     |     |
| 10.42     |    |     |     |     |     |     |     |     |     |     |     |     | C   |     |     | ?   |
| 10.49     |    |     |     |     |     |     |     |     |     |     | C   |     | C   |     |     |     |
| 10.57     |    |     |     |     |     |     |     |     |     |     | C   |     | C   |     |     |     |
