# Supplementary material
Source: PubMed Central journal article supplement (PMC1815257)
Supplement: pnas_0611226104_2.pdf [file pnas_0611226104_2.pdf]

**Table 6. Genotypes of wild barley sampled from Mt. Meron site**

|           | 64 | 120 | 151 | 194 | 249 | 269 | 277 | 286 | 336 | 339 | 351 | 462 | 546 | 549 | 603 | 625 |
|-----------|----|-----|-----|-----|-----|-----|-----|-----|-----|-----|-----|-----|-----|-----|-----|-----|
| Consensus | C  | C   | G   | A   | G   | T   | T   | A   | G   | C   | T   | C   | T   | C   | G   | A   |
| 9.3       |    |     |     |     |     |     |     |     |     |     |     |     | C   |     |     | G   |
| 9.5       |    |     |     |     |     |     |     |     |     |     |     |     |     |     |     |     |
| 9.9       |    |     |     |     |     |     |     |     |     |     | C   |     |     |     |     |     |
| 9.10      |    |     |     |     |     |     |     |     |     |     | C   |     |     |     |     |     |
| 9.12      |    |     |     |     |     |     |     |     |     |     | C   |     |     |     |     |     |
| 9.16      |    |     |     |     |     |     |     |     |     |     |     |     |     |     |     |     |
| 9.17      |    |     |     |     |     |     |     |     |     |     |     |     |     |     | ?   | ?   |
| 9.18      |    |     |     |     |     |     |     |     |     |     |     |     |     |     |     |     |
| 9.19      |    |     |     |     |     |     |     |     |     |     |     |     |     |     |     |     |
| 9.21      | T  |     | T   |     |     |     |     |     |     |     | C   | T   |     |     |     |     |
| 9.26      |    |     |     |     |     |     |     |     |     |     |     |     |     |     |     |     |
| 9.27      |    |     |     |     |     |     |     |     |     |     |     |     |     |     |     |     |
| 9.28      |    |     |     |     |     |     |     |     |     |     |     |     |     |     |     |     |
| 9.32      |    |     |     |     |     |     |     |     |     |     |     |     |     |     |     |     |
| 9.33      |    |     |     |     |     |     |     |     |     |     |     |     |     |     |     |     |
| 9.34      |    |     |     |     |     |     |     |     |     |     |     |     |     |     |     |     |
| 9.35      |    |     |     |     |     |     |     |     |     |     |     |     |     |     |     |     |
| 9.36      |    |     |     |     |     |     |     |     |     |     |     |     |     |     |     |     |
| 9.37      |    |     |     |     |     |     |     |     |     |     |     |     |     |     |     |     |
| 9.38      |    |     |     |     |     |     |     |     |     |     |     |     |     |     |     |     |
| 9.39      |    |     |     |     |     |     |     |     |     |     |     |     |     |     |     |     |
| 9.40      |    |     |     |     |     |     |     |     |     |     |     |     |     |     | ?   | ?   |
| 9.42      |    |     |     |     |     |     |     |     |     |     |     |     |     |     |     |     |
| 9.44      |    |     |     |     |     |     |     |     |     |     |     |     |     |     | ?   | ?   |
| 9.47      |    |     |     |     |     |     |     |     |     |     |     |     |     |     |     |     |
| 9.50      |    |     |     |     |     |     |     |     |     |     |     |     |     |     |     |     |
| 9.51      |    |     |     |     |     |     |     |     |     |     |     |     |     |     |     |     |
| 9.52      |    |     |     |     |     |     |     |     |     |     |     |     |     |     | ?   | ?   |
| 9.53      |    |     |     |     |     |     |     |     |     |     |     |     |     |     | ?   | ?   |
| 9.57      |    |     |     |     |     |     |     |     |     |     | C   |     |     |     | ?   | ?   |
