# Supplementary material
Source: PubMed Central journal article supplement (PMC1815257)
Supplement: pnas_0611226104_3.pdf [file pnas_0611226104_3.pdf]

**Table 7. Genotypes of wild barley sampled from Tabigha (Terra Rosa) site**

|           | 64 | 120 | 151 | 194 | 249 | 269 | 277 | 286 | 336 | 339 | 351 | 462 | 546 | 549 | 603 | 625 |
|-----------|----|-----|-----|-----|-----|-----|-----|-----|-----|-----|-----|-----|-----|-----|-----|-----|
| Consensus | C  | C   | G   | A   | G   | T   | T   | A   | G   | C   | T   | C   | T   | C   | G   | A   |
| TR.2      |    |     |     |     |     |     |     |     |     |     |     |     |     |     | ?   | ?   |
| TR.3      |    |     |     |     |     |     |     |     |     |     |     |     |     |     |     |     |
| TR.4      |    |     |     |     |     |     |     |     |     |     |     |     |     |     | ?   | ?   |
| TR.5      |    |     |     |     |     |     |     |     |     |     |     |     |     |     |     |     |
| TR.6      |    |     |     |     |     |     |     |     |     |     | C   |     |     |     |     | ?   |
| TR.7      |    |     |     |     |     |     |     |     |     |     | C   |     |     |     |     |     |
| TR.11     |    |     |     |     |     |     |     |     |     |     |     |     |     |     | ?   | ?   |
| TR.12     |    |     |     |     |     |     |     |     |     |     |     |     |     |     |     |     |
| TR.18     |    |     |     |     |     |     |     |     |     |     |     |     |     |     |     |     |
| TR.20     |    |     |     |     |     |     |     |     |     |     |     |     |     |     | ?   | ?   |
| TR.22     |    |     |     |     |     |     |     |     |     |     |     |     |     |     |     |     |
| TR.23     |    |     |     | T   |     |     |     |     |     |     | C   |     |     |     | ?   | ?   |
| TR.28     |    |     |     | A/T |     |     |     |     |     |     | T/C |     |     |     | ?   | ?   |
| TR.29     |    |     |     | T   |     |     |     |     |     |     | C   |     |     |     |     |     |
| TR.30     |    |     |     |     |     |     |     |     |     |     |     |     |     |     | ?   | ?   |
| TR.33     |    |     |     |     |     |     |     |     |     |     | C   |     |     |     |     |     |
| TR.34     |    |     |     |     |     |     |     |     |     |     | C   |     |     |     | ?   | ?   |
| TR.37     |    |     |     |     |     |     |     |     |     |     |     |     |     |     |     |     |
| TR.38     |    |     |     |     |     |     |     |     |     |     |     |     |     |     |     |     |
| TR.40     |    |     |     |     |     |     |     |     |     |     |     |     |     |     |     |     |
| TR.41     |    |     |     |     |     |     |     |     |     |     |     |     |     |     | ?   | ?   |
| TR.45     |    |     |     | T   |     |     |     |     |     |     | C   |     |     |     | ?   | ?   |
| TR.48     |    |     |     |     |     |     |     |     |     |     | C   |     |     |     |     |     |
