# Supplementary material
Source: PubMed Central journal article supplement (PMC1815257)
Supplement: pnas_0611226104_4.pdf [file pnas_0611226104_4.pdf]

**Table 8. Genotypes of wild barley sampled from Tabigha (Basalt) site**

|           | 64 | 120 | 151 | 194 | 249 | 269 | 277 | 286 | 336 | 339 | 351 | 462 | 546 | 549 | 603 | 625 |
|-----------|----|-----|-----|-----|-----|-----|-----|-----|-----|-----|-----|-----|-----|-----|-----|-----|
| Consensus | C  | C   | G   | A   | G   | T   | T   | A   | G   | C   | T   | C   | T   | C   | G   | A   |
| B.51      |    |     |     | T   |     |     |     |     |     |     | C   |     |     |     |     |     |
| B.55      |    |     |     |     |     |     |     |     |     |     | C   |     |     |     |     |     |
| B.56      |    |     |     |     |     |     |     |     |     |     | C   |     |     |     |     |     |
| B.57      |    |     |     | T   |     |     |     |     |     |     | C   |     |     |     |     |     |
| B.58      |    |     |     | T   |     |     |     |     |     |     | C   |     |     |     | ?   | ?   |
| B.60      |    |     |     | T   |     |     |     |     |     |     | C   |     |     |     | ?   | ?   |
| B.61      |    |     |     | T   |     |     |     |     |     |     | C   |     |     |     | ?   | ?   |
| B.62      |    |     |     |     |     |     |     |     |     |     |     |     |     |     |     |     |
| B.63      |    |     |     |     |     |     |     |     |     |     | C   |     |     |     |     |     |
| B.67      |    |     |     | T   |     |     |     |     |     |     | C   |     |     |     |     |     |
| B.70      |    |     |     |     |     |     |     |     |     |     |     |     |     |     |     |     |
| B.76      |    |     |     |     |     |     |     |     |     |     |     |     |     |     | ?   | ?   |
| B.78      |    |     |     |     |     |     |     |     |     |     |     |     |     |     | ?   | ?   |
| B.82      |    |     |     |     |     |     |     |     |     |     |     |     |     |     |     |     |
| B.84      |    |     |     | T   |     |     |     |     |     |     | C   |     |     |     |     |     |
| B.93      |    |     |     | T   |     |     |     |     |     |     | C   |     |     |     | ?   | ?   |
| B.96      |    |     |     |     |     |     |     |     |     |     | C   |     |     |     | ?   | ?   |
| B.99      |    |     |     |     |     |     |     |     |     |     | C   |     |     |     | ?   | ?   |
| B.100     |    |     |     | A/T |     |     |     |     |     |     | T/C |     |     |     |     |     |
