# Supplementary material
Source: PubMed Central journal article supplement (PMC1815257)
Supplement: pnas_0611226104_5.pdf [file pnas_0611226104_5.pdf]

**Table 9. Genotypes of wild barley sampled from Nahal Oren (South Facing Slope)**

|           | 64  | 120 | 151 | 194 | 249 | 269 | 277 | 286 | 336 | 339 | 351 | 462 | 546 | 549 | 603 | 625 |
|-----------|-----|-----|-----|-----|-----|-----|-----|-----|-----|-----|-----|-----|-----|-----|-----|-----|
| Consensus | C   | C   | G   | A   | G   | T   | T   | A   | G   | C   | T   | C   | T   | C   | G   | A   |
| 2.1       |     |     |     |     |     |     |     |     |     |     |     |     |     |     |     |     |
| 2.6       |     |     |     |     |     |     |     |     |     |     |     |     |     |     |     |     |
| 2.7       |     |     |     |     |     |     |     |     |     |     |     |     |     |     |     |     |
| 2.13      | T   |     |     |     |     |     |     |     |     |     | C   |     |     |     | ?   |     |
| 2.15      |     |     |     |     |     |     |     |     |     |     | C   |     |     |     |     |     |
| 2.16      |     |     |     |     |     |     |     |     |     |     | C   |     |     |     |     |     |
| 2.17      |     |     |     |     |     |     |     |     |     |     | C   |     |     |     | ?   | ?   |
| 2.18      |     |     |     |     |     |     |     |     |     |     | C   |     |     |     |     |     |
| 2.19      |     |     |     |     |     |     |     |     |     |     | C   |     |     |     |     |     |
| 2.20      | T   |     |     |     |     |     |     |     |     |     | C   |     |     |     | A   |     |
| 2.21      |     |     |     |     |     |     |     |     |     |     | C   |     |     |     |     |     |
| 2.22      | C/T |     |     |     |     |     |     |     |     |     | C   |     |     |     | G/A |     |
| 2.23      | T   |     |     |     |     |     |     |     |     |     | C   |     |     |     | A   |     |
| 2.24      | T   |     |     |     |     |     |     |     |     |     | C   |     |     |     | A   |     |
| 2.26      | T   |     |     |     |     |     |     |     |     |     | C   |     |     |     | A   |     |
| 2.32      | C/T |     |     | T/A |     |     | T/C | A/G |     |     | C   |     |     |     | G/A |     |
| 2.36      | T   |     |     |     |     |     |     |     |     |     | C   |     |     |     | A   |     |
| 2.39      | T   |     |     |     |     |     |     |     |     |     | C   |     |     |     | A   |     |
| 2.41      | T   |     |     |     |     |     |     |     |     |     | C   |     |     |     | A   |     |
| 2.44      | T   |     |     |     |     |     |     |     |     |     | C   |     |     |     | A   |     |
| 2.45      | T   |     |     |     |     |     |     |     |     |     | C   |     |     |     | A   |     |
| 2.46      | T   |     |     |     |     |     |     |     |     |     | C   |     |     |     | A   |     |
| 2.47      | T   |     |     |     |     |     |     |     |     |     | C   |     |     |     | A   |     |
| 2.49      | T   |     |     |     |     |     |     |     |     |     | C   |     |     |     | A   |     |
| 2.50      | T   |     |     |     |     |     |     |     |     |     | C   |     |     |     | A   | ?   |
| 2.56      | T   |     |     |     |     |     |     |     |     |     | C   |     |     |     | ?   | ?   |
| 2.57      | T   |     |     |     |     |     |     |     |     |     | C   |     |     |     | ?   | ?   |
