# Supplementary material
Source: PubMed Central journal article supplement (PMC1815257)
Supplement: pnas_0611226104_6.pdf [file pnas_0611226104_6.pdf]

**Table 10. Genotypes of wild barley sampled from Nahal Oren (North Facing Slope)**

|           | 64  | 120 | 151 | 194 | 249 | 269 | 277 | 286 | 336 | 339 | 351 | 462 | 546 | 549 | 603 | 625 |
|-----------|-----|-----|-----|-----|-----|-----|-----|-----|-----|-----|-----|-----|-----|-----|-----|-----|
| Consensus | C   | C   | G   | A   | G   | T   | T   | A   | G   | C   | T   | C   | T   | C   | G   | A   |
| 6.2       |     |     |     |     |     |     |     |     |     |     | C   |     |     |     |     |     |
| 6.6       |     | C/T |     | A/T |     |     |     |     |     |     | C   |     |     | C/G |     |     |
| 6.7       | T   |     |     |     |     |     |     |     |     |     | C   |     |     |     | A   |     |
| 6.8       | T   |     |     |     |     |     |     |     |     |     | C   |     |     |     | A   |     |
| 6.9       | T   |     |     |     |     |     |     |     |     |     | C   |     |     |     | A   | ?   |
| 6.10      | T   |     |     |     |     |     |     |     |     |     | C   |     |     |     | A   |     |
| 6.11      | T   |     |     |     |     |     |     |     |     |     | C   |     |     |     | A   |     |
| 6.12      | T   |     |     |     |     |     |     |     |     |     | C   |     |     |     | A   |     |
| 6.13      | C/T |     |     |     |     |     |     |     |     |     | C   |     |     |     | G/A |     |
| 6.14      | T   |     |     |     |     |     |     |     |     |     | C   |     |     |     | A   | ?   |
| 6.15      | T   |     |     |     |     |     |     |     |     |     | C   |     |     |     | A   |     |
| 6.16      | T   |     |     |     |     |     |     |     |     |     | C/T |     |     |     | A   | ?   |
| 6.17      | T   |     |     |     |     |     |     |     |     |     | C/T |     |     |     | A   | ?   |
| 6.59      | T   |     |     |     |     |     |     |     |     |     | C   |     |     |     | A   |     |
| 6.74      | T   |     |     |     |     |     |     |     |     |     | C   |     |     |     | A   |     |
| 6.79      | T   |     |     |     |     |     |     |     |     |     | C   |     |     |     | A   | ?   |
