# Supplementary material
Source: PubMed Central journal article supplement (PMC1815257)
Supplement: pnas_0611226104_7.pdf [file pnas_0611226104_7.pdf]

**Table 11. Genotypes of wild barley sampled from Wadi Qilt site**

|           | 64 | 120 | 151 | 194 | 249 | 269 | 277 | 286 | 336 | 339 | 351 | 462 | 546 | 549 | 603 | 625 |
|-----------|----|-----|-----|-----|-----|-----|-----|-----|-----|-----|-----|-----|-----|-----|-----|-----|
| Consensus | C  | C   | G   | A   | G   | T   | T   | A   | G   | C   | T   | C   | T   | C   | G   | A   |
| 23.4      |    |     |     |     |     |     |     |     |     |     |     |     |     |     | ?   | ?   |
| 23.8      |    |     |     |     |     |     |     |     |     |     |     |     |     |     | ?   | ?   |
| 23.19     |    |     |     |     |     |     |     |     |     | C/T |     |     |     |     | ?   | ?   |
| 23.24     |    |     |     |     |     |     |     |     |     | C/T |     |     |     |     |     |     |
| 23.38     |    |     |     |     |     |     |     |     | A   |     |     |     |     |     | ?   | ?   |
| 23.39     |    |     |     |     |     |     |     |     |     |     | C   |     |     |     |     |     |
| 23.41     | T  |     |     |     |     |     |     |     |     |     | C   |     |     |     |     |     |
| 23.42     |    |     |     | T   |     |     |     |     |     |     |     |     | C   |     |     |     |
| 23.53     | T  |     |     |     |     |     |     |     |     |     |     |     |     |     | ?   | ?   |
| 23.58     |    |     |     |     |     |     |     |     |     |     | C   |     |     |     | ?   | ?   |
| 23.64     |    |     |     |     |     |     |     |     |     |     |     |     |     |     |     |     |
| 23.65     | T  |     |     |     |     |     |     |     |     |     |     |     |     |     |     |     |
| 23.66     |    |     |     |     |     |     |     |     |     |     |     |     |     |     |     |     |
| 23.67     |    |     |     |     |     |     |     |     |     |     |     |     |     |     |     |     |
| 23.70     |    |     |     |     |     |     |     |     |     |     |     |     |     |     |     |     |
| 23.73     | T  |     |     |     |     |     |     |     |     |     | C   |     |     |     |     |     |
