# Supplementary material
Source: PubMed Central journal article supplement (PMC1815257)
Supplement: pnas_0611226104_8.pdf [file pnas_0611226104_8.pdf]

**Table 12. Genotypes of wild barley sampled from Sede Boqer**

|           | 64  | 120 | 151 | 194 | 249 | 269 | 277 | 286 | 336 | 339 | 351 | 462 | 546 | 549 | 603 | 625 |
|-----------|-----|-----|-----|-----|-----|-----|-----|-----|-----|-----|-----|-----|-----|-----|-----|-----|
| Consensus | C   | C   | G   | A   | G   | T   | T   | A   | G   | C   | T   | C   | T   | C   | G   | A   |
| 20.1      |     |     |     |     |     |     |     |     |     |     |     |     |     |     |     |     |
| 20.3      |     |     |     |     | T   |     |     |     |     |     |     |     |     | G   | ?   | ?   |
| 20.4      |     |     |     |     | T   |     |     |     |     |     |     |     |     | G   | ?   | ?   |
| 20.5      |     |     |     |     | T   |     |     |     |     |     |     |     |     | G   |     |     |
| 20.7      |     |     |     |     | T   |     |     |     |     |     |     |     |     | G   | ?   | ?   |
| 20.12     |     |     |     |     |     |     |     |     |     |     |     |     |     |     |     |     |
| 20.13     |     |     |     |     |     |     |     |     |     |     |     |     | C   | G   |     |     |
| 20.24     |     |     |     |     | T   |     |     |     |     |     |     |     |     | G   | ?   | ?   |
| 20.25     |     |     |     |     | T   |     |     |     |     |     |     |     |     | G   | ?   | ?   |
| 20.27     |     |     |     |     | T   |     |     |     |     |     |     |     |     | G   |     |     |
| 20.28     |     |     |     |     |     |     |     |     |     |     |     |     |     |     | ?   | ?   |
| 20.30     | T/C |     |     |     | G/T | T/C |     |     |     |     | T/C |     |     | C/G |     |     |
| 20.33     |     |     |     |     | T   |     |     |     |     |     |     |     |     | G   |     |     |
| 20.35     |     |     |     | T   |     |     |     |     |     |     | C   |     |     |     | ?   | ?   |
| 20.36     |     |     |     |     | T   |     |     |     |     |     |     |     |     | G   | ?   | ?   |
| 20.37     |     |     |     |     |     |     |     |     |     |     | C   |     |     |     | ?   | ?   |
| 20.38     |     |     |     |     |     |     |     |     |     |     | C   |     |     |     | ?   | ?   |
| 20.39     |     |     |     |     | T   |     |     |     |     |     |     |     |     | G   | ?   | ?   |
| 20.40     |     |     |     |     | T   |     |     |     |     |     |     |     |     | G   | ?   | ?   |
| 20.45     |     |     |     |     |     |     |     |     |     |     |     |     | C   |     |     |     |

Heterozygous base positions are indicated by a “/” symbol with the two alternative bases indicated. Where clearly readable, the sequence was not obtained for a SNP site; this is indicated by a “?” symbol.
