# Supplementary material
Source: PubMed Central journal article supplement (PMC1815257)
Supplement: pnas_0611226104_9.pdf [file pnas_0611226104_9.pdf]

**Table 13. Ecogeographical measurements for sample sites of wild barley populations**

| Populations             | Long (E) | Lat (N) | Alt (m) | Tm (°C) | Ta (°C) | Tj (°C) | Td (°C) | Tdd (°C) |
|-------------------------|----------|---------|---------|---------|---------|---------|---------|----------|
| Nahal Oren SFS (1)      | 35.02    | 32.43   | 75      | 19      | 24      | 11      | N/A     | N/A      |
| Nahal Oren NFS (2)      | 35.02    | 32.43   | 75      | 19      | 24      | 11      | N/A     | N/A      |
| Mt. Meron (3)           | 35.40    | 33.05   | 1,150   | 14      | 22      | 6       | 16      | 8        |
| Maalot (4)              | 35.27    | 33.00   | 500     | 17      | 23      | 8       | 15      | 10       |
| Sede Boqer (5)          | 34.78    | 30.87   | 450     | 19      | 26      | 9       | 15      | 13       |
| Wadi Qilt (6)           | 35.38    | 31.83   | 50      | 23      | 30      | 14      | 16      | 13       |
| Tabigha Terra Rosa (TR) | 35.53    | 32.90   | 0       | 24      | 32      | 15      | 17      | 10       |
| Tabigha Basalt (B)      | 35.53    | 32.90   | 0       | 24      | 32      | 15      | 17      | 10       |
|                         | Sh (#)   | Trd (#) | Rn (mm) | Rd (#)  | Hu14    | Hua     | Dw (#)  | Ev       |
| Nahal Oren SFS (1)      | N/A      | N/A     | 690     | N/A     | 59      | N/A     | N/A     | N/A      |
| Nahal Oren NFS (2)      | N/A      | N/A     | 690     | N/A     | 59      | N/A     | N/A     | N/A      |
| Mt. Meron (3)           | 85       | 0       | 1,010   | 65      | 49      | 61      | 50      | 155      |
| Maalot (4)              | 68       | 0       | 785     | 55      | 50      | 64      | 55      | 150      |
| Sede Boqer (5)          | N/A      | 100     | 91      | 15      | 36      | 53      | 70      | 168      |
| Wadi Qilt (6)           | 110      | 125     | 170     | 32      | 40      | 55      | 25      | 180      |
| Tabigha Terra Rosa (TR) | 60       | 120     | 436     | 45      | 45      | 57      | 58      | 160      |
| Tabigha Basalt (B)      | 60       | 120     | 436     | 45      | 45      | 57      | 58      | 160      |

Long(E), longitude east; Lat(N), latitude north; Alt, altitude; Tm, mean annual temperature; Ta, mean temperature in August; Tj, mean temperature in January; Td, mean seasonal temperature difference; Tdd, mean diurnal temperature difference; Sh, mean number of hot and dry days; Trd, mean number of tropical days; Rn, mean annual rainfall; Rd, mean number of rainy days; Hu14, mean humidity at 14:00 hours; Hua, mean annual humidity; Dw, mean number of dewy nights in summer; Ev, mean annual evaporation. Taken from Nevo *et al.* (7).

1. Harlan JR, Zohary D (1966) *Science* 153:1074-1080.
2. Hejgaard J, Bjorn S, Nielsen G (1984) *Theor Appl Genet* 68:127-130.
3. Sancho A, Faulds C, Svensson B, Bartolme B, Williamson G, Juge N (2003) *Biochim Biophys Acta* 1650:136-144.
4. Furtado A, Henry R, Scott K, Meech S (2003) *Plant Mol Biol* 52:787-799.
5. Leah R, Mundy J (1989) *Plant Mol Biol* 12:673-682.
6. Grishan I, Beharav A, Nevo E (2006) *Biol J Linn Soc*, in press.
7. Nevo E, Moseman JG, Beiles A, Zohary D (1985) *Genetica* 67:209-222.
